# Supplementary material for: Photoelectrochemical enzymatic sensor for glucose based on Au@C/TiO2 nanorod arrays
Source: Royal Society of Chemistry journal article supplement (doi:10.1039/d0ra08920f), 2020-01-01
Supplement: d0ra08920f1.pdf [file d0ra08920f1.pdf]

## Supporting Information

# Photoelectrochemical enzymatic sensor for glucose based on Au@C/TiO<sub>2</sub> nanorod arrays

*Lianyuan Ge<sup>a</sup>, Rui Hou<sup>a</sup>, Yang Cao<sup>a,c</sup>, Jinchun Tu<sup>a,\*</sup> and Qiang Wu<sup>b,\*</sup>*

<sup>a</sup> Key Laboratory of Advanced Materials of Tropical Island Resources, State Key Laboratory of Marine Resource Utilization in South China Sea, Hainan University, Haikou 570228, P. R. China.

<sup>b</sup> School of Tropical Medicine and Laboratory Medicine, Key Laboratory of Emergency and Trauma of Ministry of Education, Hainan Medical University, Haikou 571199, China.

<sup>c</sup> Key Laboratory Of Child Cognition & Behavior Development Of Hainan Province, Qiongtai Normal University, Haikou 571127, P. R. China.

---

\* Corresponding author: [tujinchun@hainu.edu.cn](mailto:tujinchun@hainu.edu.cn) (Jinchun Tu)

\* Corresponding author: [wuqiang001001@aliyun.com](mailto:wuqiang001001@aliyun.com) (Qiang Wu)

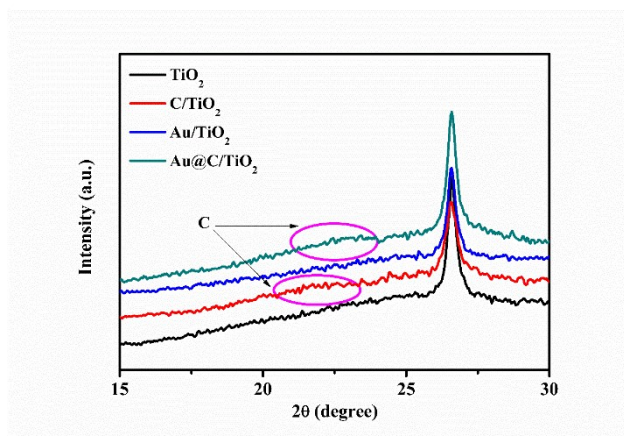

**Fig. S1** XRD patterns of  $\text{TiO}_2$ ,  $\text{C}/\text{TiO}_2$ ,  $\text{Au}/\text{TiO}_2$  and  $\text{Au}@C/\text{TiO}_2$  between  $15^\circ$  and  $30^\circ$ .

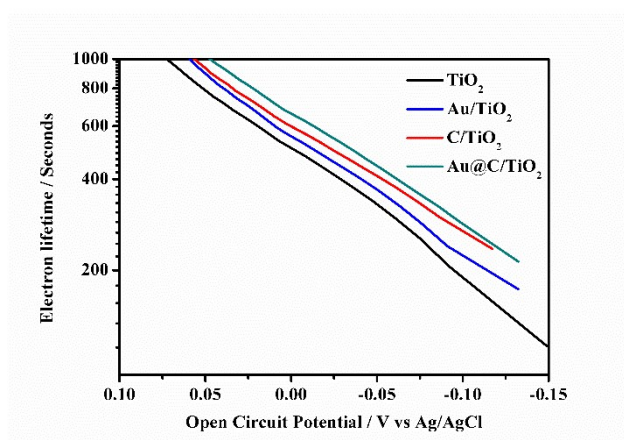

**Fig. S2** Electron lifetime measurements of  $\text{TiO}_2$ ,  $\text{C}/\text{TiO}_2$ ,  $\text{Au}/\text{TiO}_2$ ,  $\text{Au}@C/\text{TiO}_2$  determined from the decay of open circuit potential in dark

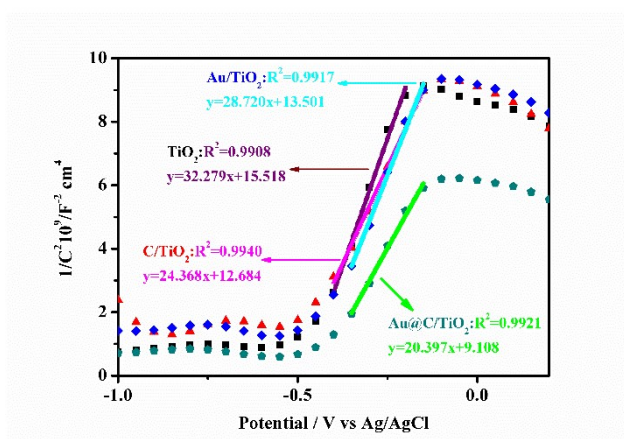

**Fig. S3** Mott-Schottky plots of  $\text{TiO}_2$ ,  $\text{C}/\text{TiO}_2$ ,  $\text{Au}/\text{TiO}_2$ ,  $\text{Au}@C/\text{TiO}_2$  at a fixed frequency of 1 kHz in dark.
